# Supplementary material for: Optimized Data-Independent Acquisition Approach for Proteomic Analysis at Single-Cell Level
Source: Research Square preprint supplement (doi:10.21203/rs.3.rs-977693/v2), 2021-12-22
Supplement: Supplementary file 1 [file aef7090f342eafae95820cf3.xlsx]

## Sheet: S-Table 1
250,000 cells	total peptide amount (µg)	peptide per cell (ng)
PACC-1 (cisplatin treated)	54.8	0.219
PACC-2 (docetaxel treated)	53.6	0.214
MDA-1	15.93	0.064
MDA-2	13.47	0.054
MDA-3	12.09	0.048

## Sheet: S-Table 2
	sample name	cell number	gradient time (min)
1	PACC-1	1	120
2	PACC-1	1	15
3	PACC-2	1	120
4	PACC-2	1	15
5	MDA-1	1	120
6	MDA-1	1	15
7	MDA-2	1	120
8	MDA-2	1	15
9	MDA-3	1	120
10	MDA-3	1	15
11	PACC-1	10	120
12	PACC-1	10	15
13	PACC-2	10	120
14	PACC-2	10	15
15	MDA-1	10	120
16	MDA-1	10	15
17	MDA-2	10	120
18	MDA-2	10	15
19	MDA-3	10	120
20	MDA-3	10	15
21	PACC-1	100	120
22	PACC-1	100	15
23	PACC-2	100	120
24	PACC-2	100	15
25	MDA-1	100	120
26	MDA-1	100	15
27	MDA-2	100	120
28	MDA-2	100	15
29	MDA-3	100	120
30	MDA-3	100	15

## Sheet: S-Table 3 
GS-1r_M	sample name	cell number	gradient time (min)		GS-1r_P	sample name	cell number	gradient time (min)		GS-10r	sample name	cell number	gradient time (min)		GS-16r	sample name	cell number	gradient time (min)		GS-20r	sample name	cell number	gradient time (min)		GS-30r	sample name	cell number	gradient time (min)
1	MDA-1	1	15		1	PACC-1	1	15		1	PACC-1	1	120		1	PACC-1	1	120		1	PACC-1	1	120		1	PACC-1	1	120
										2	PACC-1	1	15		2	PACC-1	1	15		2	PACC-1	1	15		2	PACC-1	1	15
										3	PACC-2	1	120		3	PACC-2	1	120		3	PACC-2	1	120		3	PACC-2	1	120
										4	PACC-2	1	15		4	PACC-2	1	15		4	PACC-2	1	15		4	PACC-2	1	15
										5	MDA-1	1	120		5	MDA-1	1	120		5	MDA-1	1	120		5	MDA-1	1	120
										6	MDA-1	1	15		6	MDA-1	1	15		6	MDA-1	1	15		6	MDA-1	1	15
										7	MDA-2	1	120		7	MDA-2	1	120		7	MDA-2	1	120		7	MDA-2	1	120
										8	MDA-2	1	15		8	MDA-2	1	15		8	MDA-2	1	15		8	MDA-2	1	15
										9	MDA-3	1	120		9	MDA-3	1	120		9	MDA-3	1	120		9	MDA-3	1	120
										10	MDA-3	1	15		10	MDA-3	1	15		10	MDA-3	1	15		10	MDA-3	1	15
															11	MDA-1	10	120		11	PACC-1	10	120		11	PACC-1	10	120
															12	MDA-1	10	15		12	PACC-1	10	15		12	PACC-1	10	15
															13	MDA-2	10	120		13	PACC-2	10	120		13	PACC-2	10	120
															14	MDA-2	10	15		14	PACC-2	10	15		14	PACC-2	10	15
															15	MDA-3	10	120		15	MDA-1	10	120		15	MDA-1	10	120
															16	MDA-3	10	15		16	MDA-1	10	15		16	MDA-1	10	15
																				17	MDA-2	10	120		17	MDA-2	10	120
																				18	MDA-2	10	15		18	MDA-2	10	15
																				19	MDA-3	10	120		19	MDA-3	10	120
																				20	MDA-3	10	15		20	MDA-3	10	15
																									21	PACC-1	100	120
																									22	PACC-1	100	15
																									23	PACC-2	100	120
																									24	PACC-2	100	15
																									25	MDA-1	100	120
																									26	MDA-1	100	15
																									27	MDA-2	100	120
																									28	MDA-2	100	15
																									29	MDA-3	100	120
																									30	MDA-3	100	15

## Sheet: S-Table 4
G10c-1r_M	sample name	cell number	gradient time (min)		G10c-1r_P	sample name	cell number	gradient time (min)		G10c-10r	sample name	cell number	gradient time (min)		G10c-16r	sample name	cell number	gradient time (min)		GS-30r	sample name	cell number	gradient time (min)		G10c-25r	sample name	cell number	gradient time (min)
1	MDA-1	10	15		1	PACC-1	10	15		1	PACC-1	10	120		1	PACC-1	10	120		1	PACC-1	1	120		1	PACC-1	10	120
										2	PACC-1	10	15		2	PACC-1	10	15		2	PACC-1	1	15		2	PACC-1	10	15
										3	PACC-2	10	120		3	PACC-2	10	120		3	PACC-2	1	120		3	PACC-2	10	120
										4	PACC-2	10	15		4	PACC-2	10	15		4	PACC-2	1	15		4	PACC-2	10	15
										5	MDA-1	10	120		5	MDA-1	10	120		5	MDA-1	1	120		5	MDA-1	10	120
										6	MDA-1	10	15		6	MDA-1	10	15		6	MDA-1	1	15		6	MDA-1	10	15
										7	MDA-2	10	120		7	MDA-2	10	120		7	MDA-2	1	120		7	MDA-2	10	120
										8	MDA-2	10	15		8	MDA-2	10	15		8	MDA-2	1	15		8	MDA-2	10	15
										9	MDA-3	10	120		9	MDA-3	10	120		9	MDA-3	1	120		9	MDA-3	10	120
										10	MDA-3	10	15		10	MDA-3	10	15		10	MDA-3	1	15		10	MDA-3	10	15
															11	MDA-1	100	120		11	PACC-1	10	120		11	PACC-1	100	120
															12	MDA-1	100	15		12	PACC-1	10	15		12	PACC-1	100	15
															13	MDA-2	100	120		13	PACC-2	10	120		13	PACC-2	100	120
															14	MDA-2	100	15		14	PACC-2	10	15		14	PACC-2	100	15
															15	MDA-3	100	120		15	MDA-1	10	120		15	MDA-1	100	120
															16	MDA-3	100	15		16	MDA-1	10	15		16	MDA-1	100	15
																				17	MDA-2	10	120		17	MDA-2	100	120
																				18	MDA-2	10	15		18	MDA-2	100	15
																				19	MDA-3	10	120		19	MDA-3	100	120
																				20	MDA-3	10	15		20	MDA-3	100	15
																				21	PACC-1	100	120		21	PACC-1	1 µg	120
																				22	PACC-1	100	15		22	PACC-2	1 µg	120
																				23	PACC-2	100	120		23	MDA-1	1 µg	120
																				24	PACC-2	100	15		24	MDA-2	1 µg	120
																				25	MDA-1	100	120		25	MDA-3	1 µg	120
																				26	MDA-1	100	15
																				27	MDA-2	100	120
																				28	MDA-2	100	15
																				29	MDA-3	100	120
																				30	MDA-3	100	15

## Sheet: S-Table 5
sample	co-searching group	largest cell population	identified protein groups
single MDA-1	GS-1r_M	single MDA cancer cell	126
single MDA-1	GS-10r	single PACC	389
single MDA-1	GS-16r	ten MDA cancer cells	406
single MDA-1	GS-20r	ten PACCs	243
single MDA-1	GS-30r	one hundred PACCs	131
single PACC-1	GS-1r_P	single PACC	621
single PACC-1	GS-10r	single PACC	689
single PACC-1	GS-16r	ten MDA cancer cells	997
single PACC-1	GS-20r	ten PACCs	1530
single PACC-1	GS-30r	one hundred PACCs	1190
ten MDA-1	GS-10r_M	ten MDA cancer cell	920
ten MDA-1	GS10c-10r	ten PACCs	1734
ten MDA-1	GS10c-16r	one hundred MDA cancer cells	1816
ten MDA-1	GS-30r	one hundred PACCs	1624
ten MDA-1	GS10c-25r	1 µg	1383
ten PACC-1	GS-10r_P	ten PACCs	2067
ten PACC-1	GS10c-10r	ten PACCs	2587
ten PACC-1	GS10c-16r	one hundred MDA cancer cells	2849
ten PACC-1	GS-30r	one hundred PACCs	3260
ten PACC-1	GS10c-25r	1 µg	2882
